# Supplementary material for: DNA-mediated cooperativity facilitates the co-selection of cryptic enhancer sequences by SOX2 and PAX6 transcription factors
Source: PubMed Central journal article supplement (PMC4330359; doi:10.1093/nar/gku1390), 2015-01-10
Supplement: supp_gku1390_nar-03404-x-2014-File011.pdf [file supp_gku1390_nar-03404-x-2014-File011.pdf]

**Supplementary Table 1.** List of BP cloning primers used in this study. Forward and reverse primers are indicated as “primer name\_f” and “primer name\_r” respectively. Gene-specific sequences are underlined. Mutant sites are indicated in red color.

| <b>Primer name</b> | <b>Sequences</b>                                                                                     |
|--------------------|------------------------------------------------------------------------------------------------------|
| pax1_f             | 5' <u>GGGGACAAGTTTGTACAAAAAGCAGGCTTCGAAAACCTGTATTTTCAGGG</u><br><u>CACGTACGGCGAAGTGAACCAACTTG3'</u>  |
| pax1_r             | 5' <u>GGGGACCACTTTGTACAAGAAAGCTGGGTTTAGCTGCCAATCTTATTTTCGC</u><br><u>AGGATG3'</u>                    |
| pax2_f             | 5' <u>GGGGACAAGTTTGTACAAAAAGCAGGCTTCGAAAACCTGTATTTTCAGGG</u><br><u>CACGTACGGCGAAGTGAACCAACTTG3'</u>  |
| pax2_r             | 5' <u>GGGGACCACTTTGTACAAGAAAGCTGGGTTTACTGCTGAACTTTGGTCCGG</u><br><u>ATGATCC</u>                      |
| pax3_f             | 5' <u>GGGGACAAGTTTGTACAAAAAGCAGGCTTCGAAAACCTGTATTTTCAGGG</u><br><u>CGACGTACGGCGAAGTGAACCAACTTG3'</u> |
| pax3_r             | 5' <u>GGGGACCACTTTGTACAAGAAAGCTGGGTTTATTTTCCAAATTTACTCCTC</u><br><u>AGGATG3'</u>                     |
| pax4_f             | 5' <u>GGGGACAAGTTTGTACAAAAAGCAGGCTTCGAAAACCTGTATTTTCAGGG</u><br><u>CACGTACGGCGAAGTGAACCAACTTG3'</u>  |
| pax4_r             | 5' <u>GGGGACCACTTTGTACAAGAAAGCTGGGTTTAGTCTTCCTGAAGTGCCCGA</u><br><u>AGTAC3'</u>                      |
| pax6_f             | 5' <u>GGGGACAAGTTTGTACAAAAAGCAGGCTTCGAAAACCTGTATTTTCAGGG</u><br><u>CAGTCACAGCGGAGTGAATC3'</u>        |
| pax6_r             | 5' <u>GGGGACCACTTTGTACAAGAAAGCTGGGTTTACTGTTGCTTTTCGCTAGC3</u><br><u>'</u>                            |
| pax8_f             | 5' <u>GGGGACAAGTTTGTACAAAAAGCAGGCTTCGAAAACCTGTATTTTCAGGG</u><br><u>CGACGTACGGCGAAGTGAACCAACTTG3'</u> |
| pax8_r             | 5' <u>GGGGACCACTTTGTACAAGAAAGCTGGGTTTACTGCTGCACCTTTGGTCCGG</u><br><u>ATGATTC3'</u>                   |
| pax9_f             | 5' <u>GGGGACAAGTTTGTACAAAAAGCAGGCTTCGAAAACCTGTATTTTCAGGG</u><br><u>CGACGTACGGCGAAGTGAACCAACTTG3'</u> |
| pax9_r             | 5' <u>GGGGACCACTTTGTACAAGAAAGCTGGGTTTAGTTGCCGATCTTGTTGCCG</u><br><u>AGAATAC3'</u>                    |
| Sox2_D123G_f       | 5' GACGCTCATGAAGAAGG <b>G</b> TAAGTACACGCTTCCC3'                                                     |
| Sox2_D123G_r       | 5' GGGAAGCGTGTACTTAC <b>C</b> CCTTCTTCATGAGCGTC3'                                                    |
| pax6_G36R_f        | 5' GAGCTAGCTCACAGC <b>C</b> GGGCCCGGCCGTGC3'                                                         |
| pax6_G36R_r        | 5' GCACGGCCGGGCC <b>C</b> GGCTGTGAGCTAGCTC3'                                                         |
| pax6_R44Q_f        | 5' GTGCGACATTTCCC <b>A</b> AATTCTGCAGGTATCC3'                                                        |
| pax6_R44Q_r        | 5' GGATACCTGCAGAA <b>T</b> TTGGGAAATGTCGCAC3'                                                        |

**Supplementary Table 2.** List of DNA elements used in this study. The following DNA sequences labeled at the 5' end with 5-Carboxyfluorescein (FAM) or Cy5 were employed in the study. Sox half sites are colored blue and pax half sites are colored orange.

| Name                 | Forward strand sequence                             |
|----------------------|-----------------------------------------------------|
| <i>DC5</i>           | 5' AAATATTCATTGTTGT <b>TGCTCACCTACCATGGATCC3'</b>   |
| <i>DC5con</i>        | 5' AAATATTCATTGTTGATGTT <b>CACGCATCATGGATCC3'</b>   |
| <i>N3core</i>        | 5' TC <b>TTTTGTTTGGGATTACTGAGAGCTTAGCCTA3'</b>      |
| "-2"                 | 5' TCTGAAATATTCATTGTT <b>TGCTCACCTACCATGGATCC3'</b> |
| "-1"                 | 5' CTGAAATATTCATTGTT <b>TGCTCACCTACCATGGATCC3'</b>  |
| "+1"                 | 5' GAAATATTCATTGTTGGT <b>TGCTCACCTACCATGGATCC3'</b> |
| "+2"                 | 5' AAATATTCATTGTTGGGT <b>TGCTCACCTACCATGGATCC3'</b> |
| "+3"                 | 5' AATATTCATTGTTGGGGT <b>TGCTCACCTACCATGGATCC3'</b> |
| "+4"                 | 5' ATATTCATTGTTGGGGGT <b>TGCTCACCTACCATGGATCC3'</b> |
| "+5"                 | 5' TATTCATTGTTGGGGGGT <b>TGCTCACCTACCATGGATCC3'</b> |
| <i>Lama 1</i>        | 5' ATCCAGGACAATAGAGACTGT3'                          |
| <i>Pax6_xtal</i>     | 5' AAGCAT <b>TTT</b> CACGCATGAGTGCACAG3'            |
| <i>DC5_Pax6_site</i> | 5' GTTGT <b>TGCTCACCTACCATGGACAAT3'</b>             |
| <i>LE9</i>           | 5' AAATATTAATTGATTTGAATGGGCAATGAGCGGAAA3'           |
| G8                   | 5' AAATATTCATTGTTGT <b>TGCTCACGT</b> TACCATGGATCC3' |
| C9                   | 5' AAATATTCATTGTTGT <b>TGCTCACCC</b> ACCATGGATCC3'  |
| T11                  | 5' AAATATTCATTGTTGT <b>TGCTCACCTAT</b> CATGGATCC3'  |
| T3                   | 5' AAATATTCATTGTTGT <b>TGTT</b> CACCTACCATGGATCC3'  |
| G8C9                 | 5' AAATATTCATTGTTGT <b>TGCTCACGC</b> ACCATGGATCC3'  |
| T3G8C9               | 5' AAATATTCATTGTTGT <b>TGTT</b> CACGCACCATGGATCC3'  |
| G8C9T11              | 5' AAATATTCATTGTTGT <b>TGCTCACGCAT</b> CATGGATCC3'  |
| T3C9T11              | 5' AAATATTCATTGTTGT <b>TGTT</b> CACCCATCATGGATCC3'  |
| T3T11                | 5' AAATATTCATTGTTGT <b>TGTT</b> CACCTATCATGGATCC3'  |
| ACACA                | 5' AGGTTTGTATTCATTC <b>TTTT</b> CAGCTTGCTTGGATTT3'  |
| FGFR2                | 5' AAAGGATAATTGTGGT <b>TTCT</b> CAGTTACAAGCTCGAT3'  |
| UPP2                 | 5' CTTCTGTTTTTCTT <b>TCAG</b> CACGTGCATGAGGTCCAT3'  |
| EFNA5                | 5' AGGTTTGTATTCATTC <b>TTTT</b> CAGCTTGCTTGGATTT3'  |
| <i>DC5con'-1</i>     | 5' AAATATTCATTGTTGG <b>TG</b> CACTCATGCGTGAAATCC3'  |
| <i>DC5con'-2</i>     | 5' AAATATTCATTGTTGT <b>TG</b> CACTCATGCGTGAAATCC3'  |

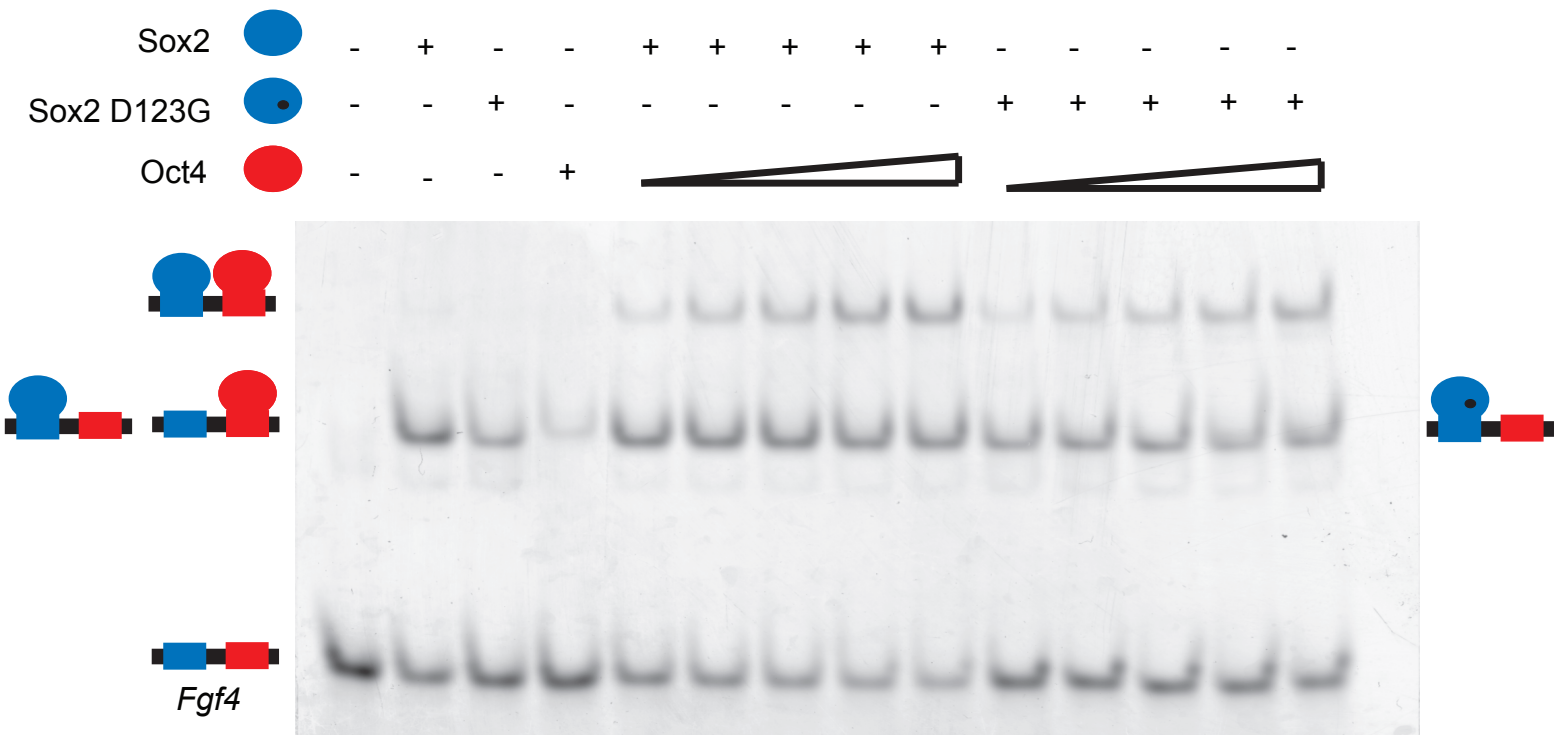

**Supplementary Figure 1. Cooperativity of Sox2 and Oct4 is not altered due to point mutation D123G on Sox2.**

EMSA to compare the potential of Sox2 and Sox2 D123G to cooperate with Oct4 on Fgf4 DNA element. Cooperativity was not altered due to a point mutation D123G on Sox2. The cartoons on the left and right depicts the different binary and ternary complexes formed during EMSA.
